# Supplementary material for: Therapeutic Promises of Plant Metabolites against Monkeypox Virus: An In Silico Study
Source: Adv Virol. 2023 Sep 2;2023:9919776. doi: 10.1155/2023/9919776 (PMC10492655; doi:10.1155/2023/9919776)
Supplement: Supplementary Materials — Supplementary File 1: list of 56 antiviral plant metabolites obtained from literature studies. Supplementary File 2: docking results of plant-derived metabolites against monkeypox profilin-like protein. [file 9919776.f1.zip]

Archive with 2 entries (2 files):
- Supplementary File 1 (1).docx
- Supplementary File 2 (1).docx
